# Supplementary material
Source: publisher figshare collection journal article supplement (https://acs.figshare.com/ndownloader/files/5754090)

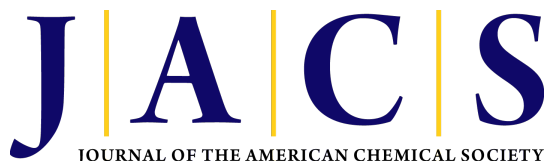

JOURNAL OF THE AMERICAN CHEMICAL SOCIETY

J. Am. Chem. Soc., 1997, 119(51), 12578-12589, DOI: [10.1021/ja964436j](https://doi.org/10.1021/ja964436j)

#### Terms & Conditions

Electronic Supporting Information files are available without a subscription to ACS Web Editions. The American Chemical Society holds a copyright ownership interest in any copyrightable Supporting Information. Files available from the ACS website may be downloaded for personal use only. Users are not otherwise permitted to reproduce, republish, redistribute, or sell any Supporting Information from the ACS website, either in whole or in part, in either machine-readable form or any other form without permission from the American Chemical Society. For permission to reproduce, republish and redistribute this material, requesters must process their own requests via the RightsLink permission system. Information about how to use the RightsLink permission system can be found at <http://pubs.acs.org/page/copyright/permissions.html>

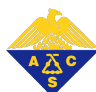

ACS Publications

MOST TRUSTED. MOST CITED. MOST READ.

Copyright © 1997 American Chemical Society

**Figure Captions for Supplementary Material**

**Figure S1.** Transient resonance Raman spectra of the ethynyl region of compound I in THF obtained with pulsed excitation at 436 nm. (A) result of subtraction of spectrum (C) from spectrum (B); scaling factor = 8.26; (B) high power (28 mW) spectrum; (C) low power (2.1 mW) spectrum. Excitation wavelength = 436 nm, pulse width = 5 ns, T = 25 °C.

**Figure S2.** Transient resonance Raman spectra of the ethynyl region of compound I in THF obtained with pulsed excitation at 436 nm. (A) result of subtraction of spectrum (C) from spectrum (B); scaling factor = 7.08; (B) high power (28 mW) spectrum; (C) low power (2.1 mW) spectrum. Excitation wavelength = 436 nm, pulse width = 5 ns, T = 25 °C. Digital subtraction of the spectra was performed with LabCalc version 2.0 (Galactic Industries). Prior to subtraction, the baseline of each spectrum was corrected with the "multiple point" routine in LabCalc. A scaling factor was chosen so that no negative peaks appeared in the difference spectrum. The second-derivative-like feature in the difference spectrum is weak but reproducible, thus indicating broadening of the wings of the ethynyl mode upon high-intensity laser excitation.

**Figure S3.** Transient resonance Raman spectra of the ethynyl region of compound II in THF obtained with pulsed excitation at 436 nm. (A) result of subtraction of spectrum (C) from spectrum (B); scaling factor = 2.47; (B) high power (16 mW) spectrum; (C) low power (1.2 mW) spectrum. Excitation wavelength = 436 nm, pulse width = 5 ns, T = 25 °C.

**Figure S4.** Transient resonance Raman spectra of the ethynyl region of compound **II** in THF obtained with pulsed excitation at 436 nm. (A) result of subtraction of spectrum (C) from spectrum (B); scaling factor = 2.55; (B) high power (16 mW) spectrum; (C) low power (1.2 mW) spectrum. Excitation wavelength = 436 nm, pulse width = 5 ns, T = 25 °C. Digital subtraction of the spectra was performed with LabCalc version 2.0 (Galactic Industries). Prior to subtraction, the baseline of each spectrum was corrected with the "multiple point" routine in LabCalc. A scaling factor was chosen so that no negative peaks appeared in the difference spectrum. The second-derivative-like feature in the difference spectrum is weak but reproducible, thus indicating broadening of the wings of the ethynyl mode upon high-intensity laser excitation.

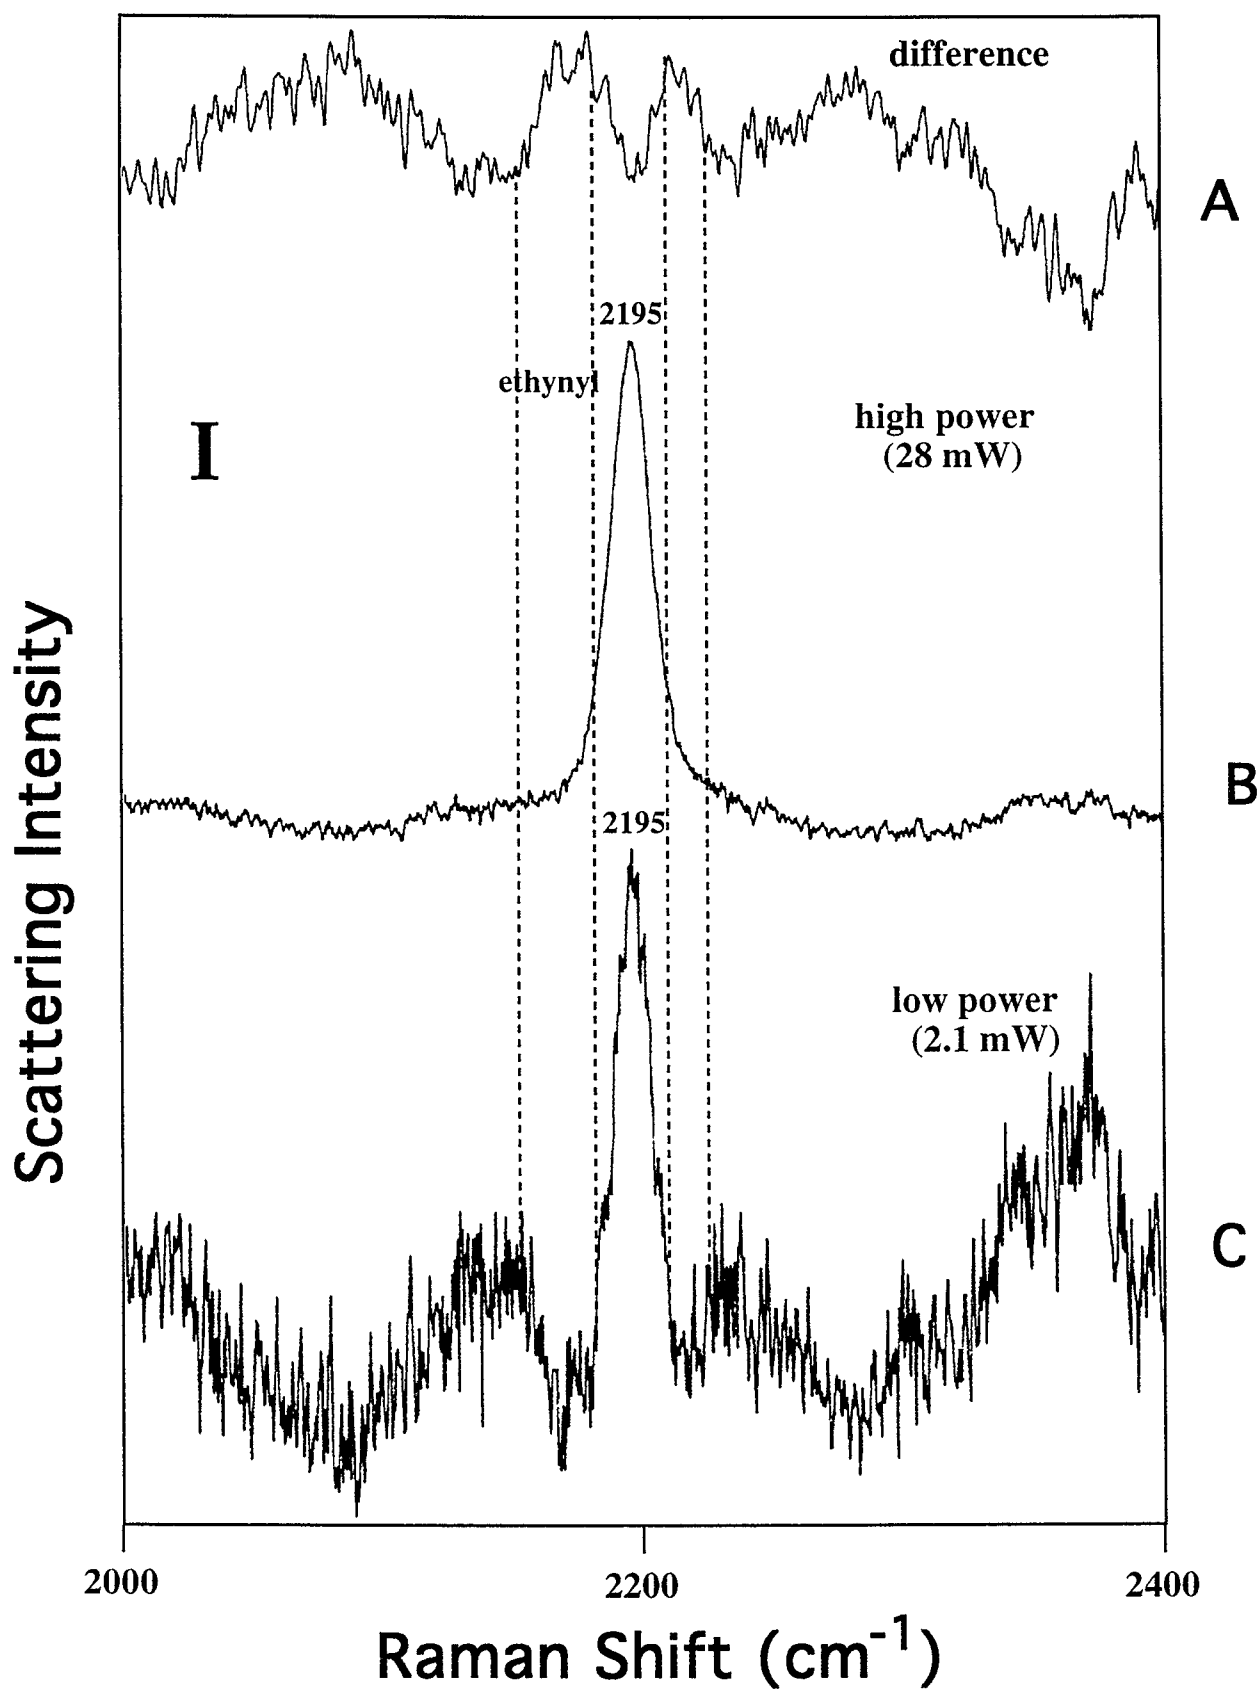

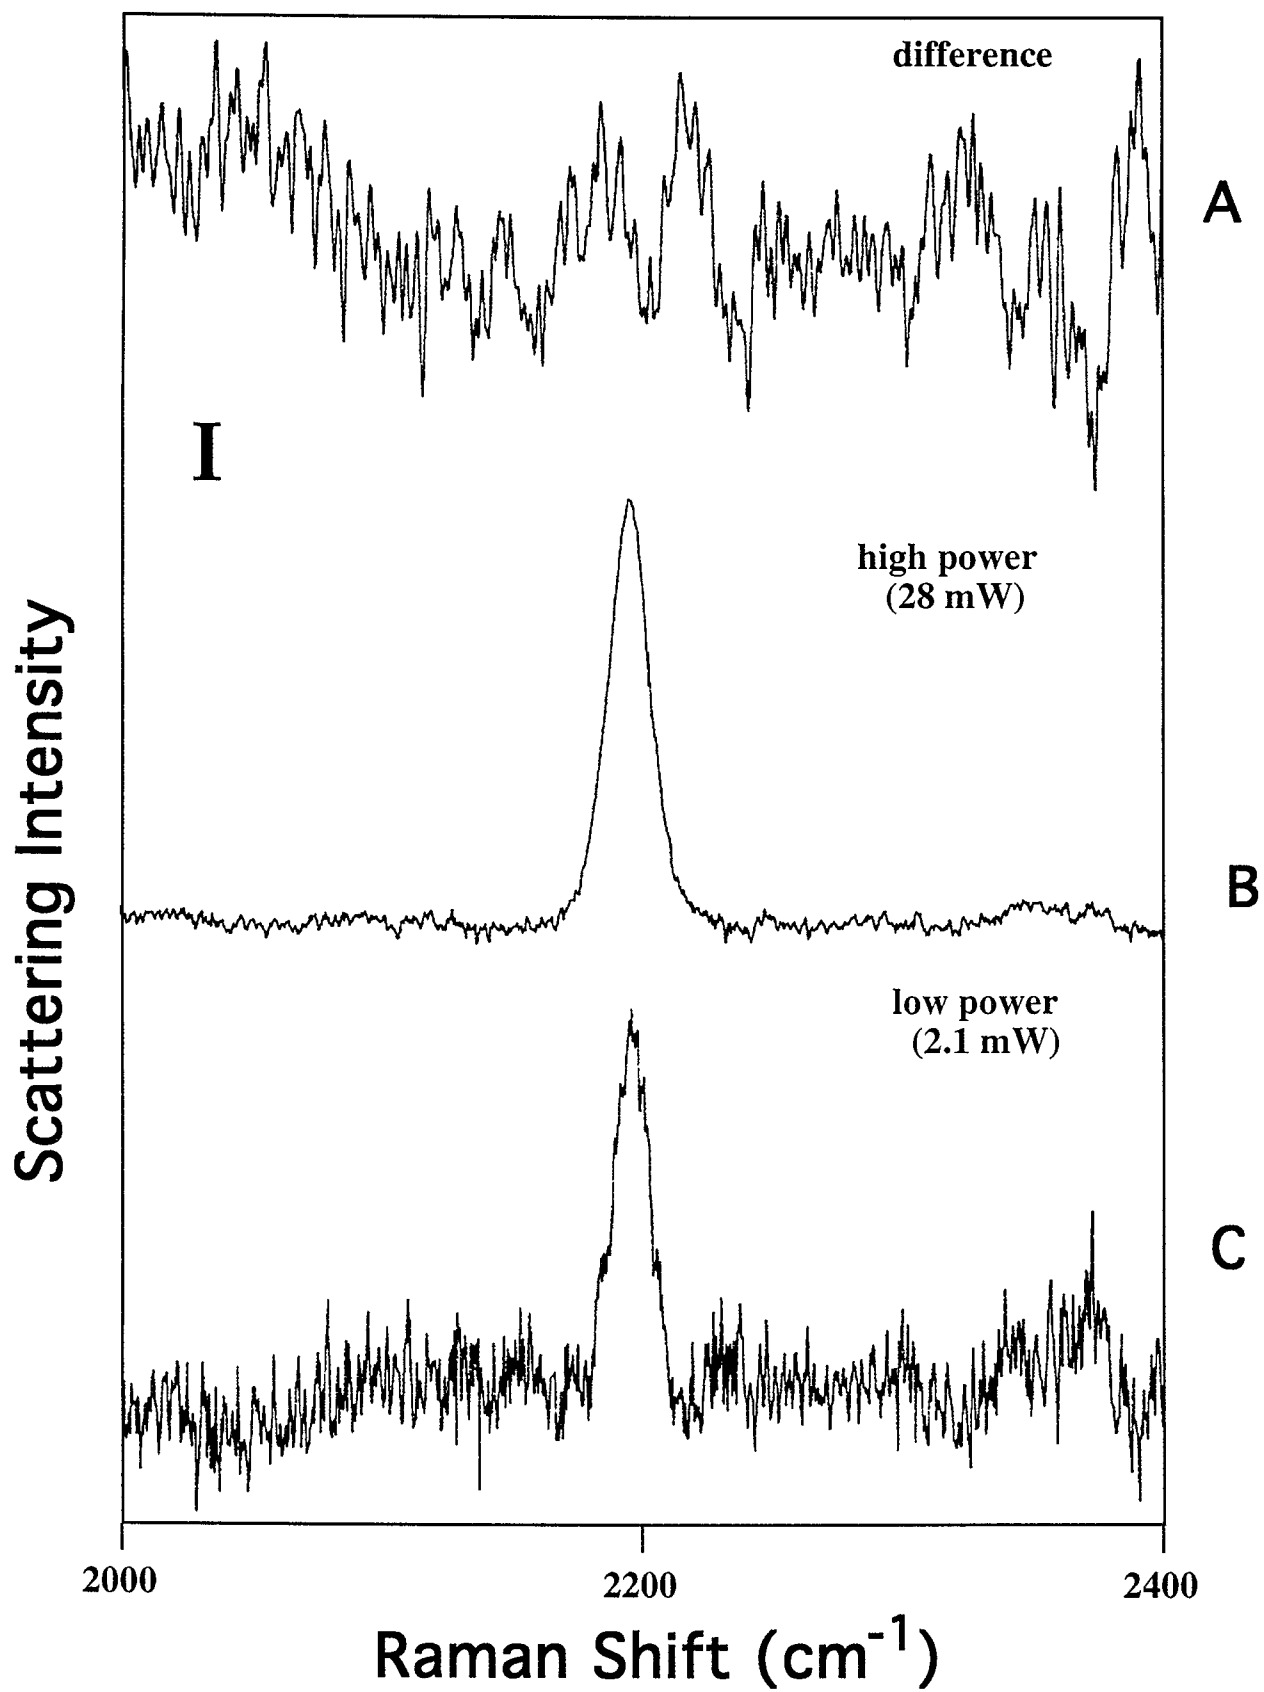

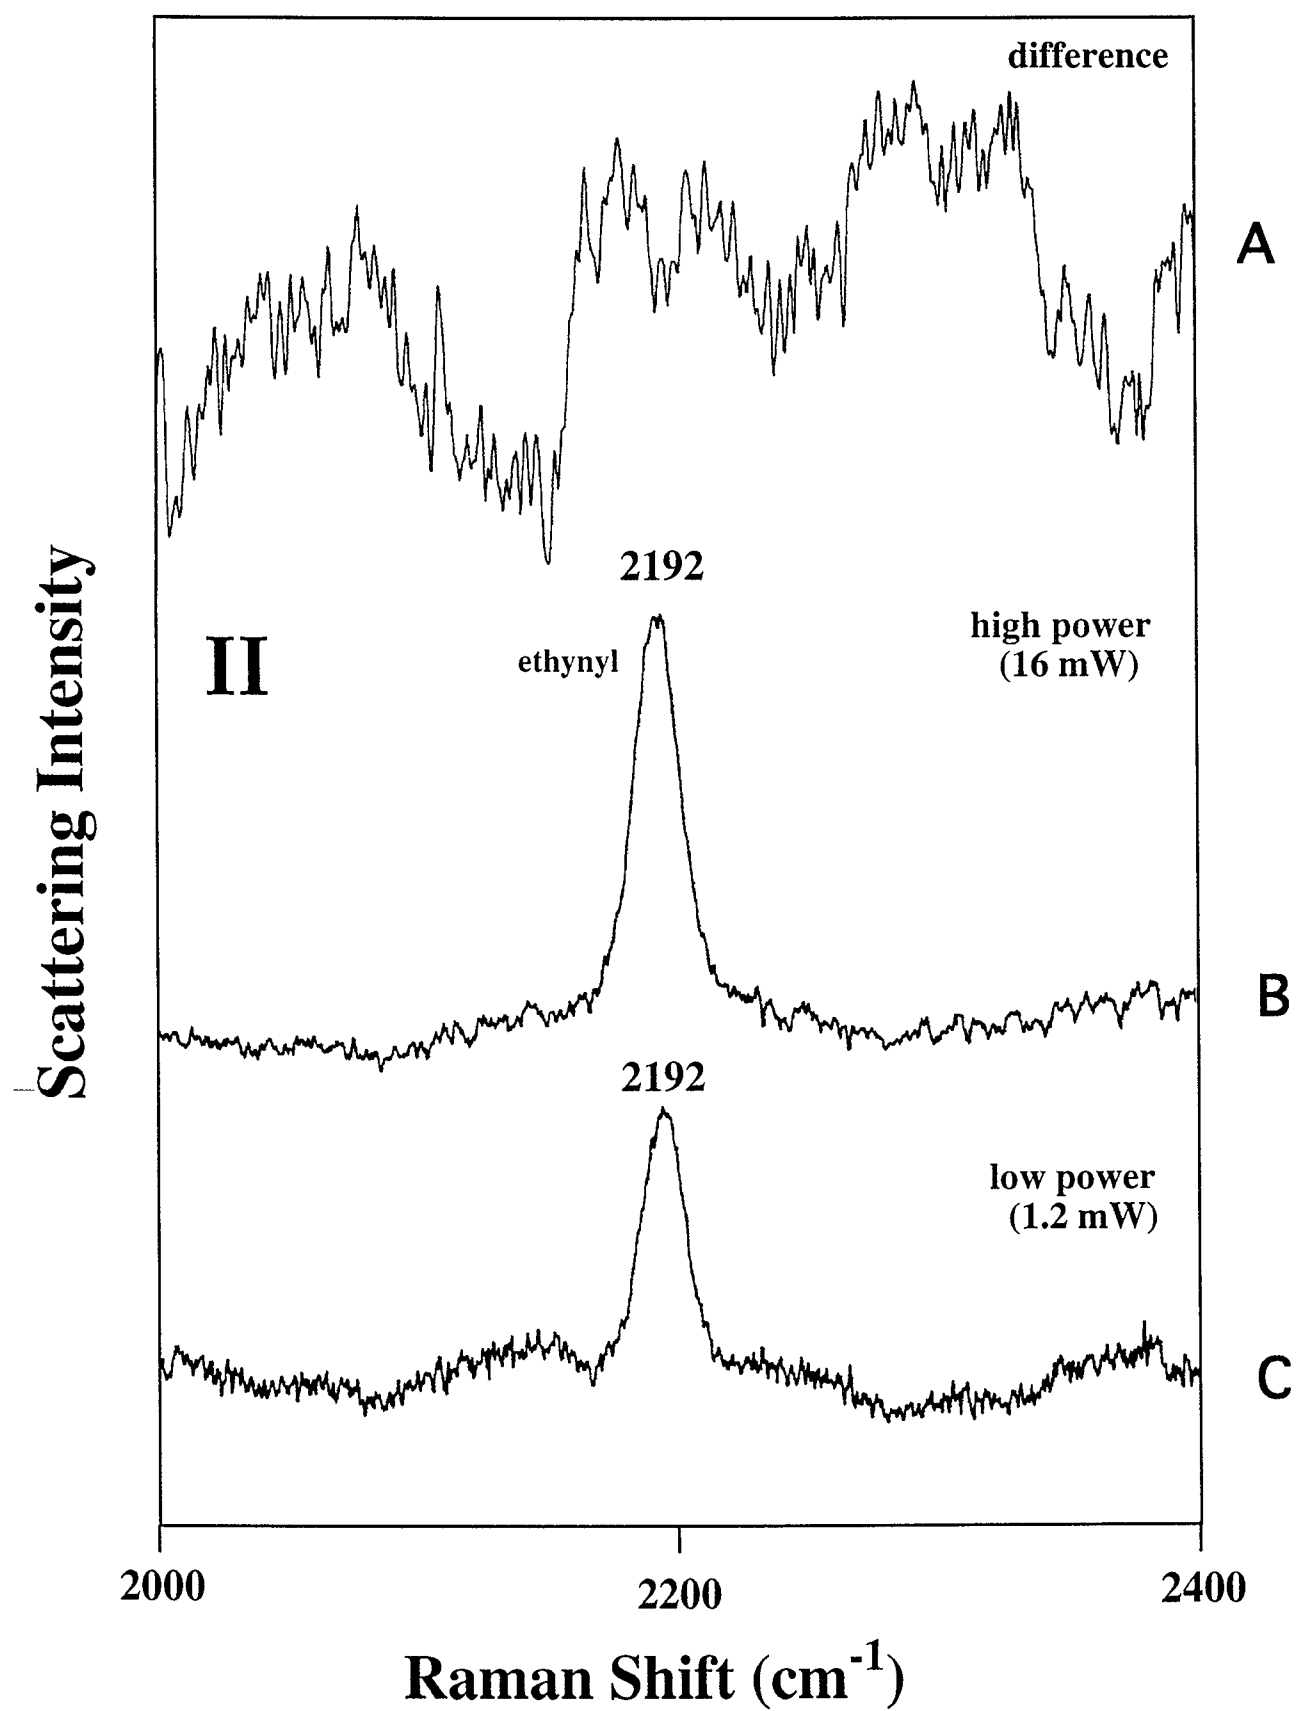

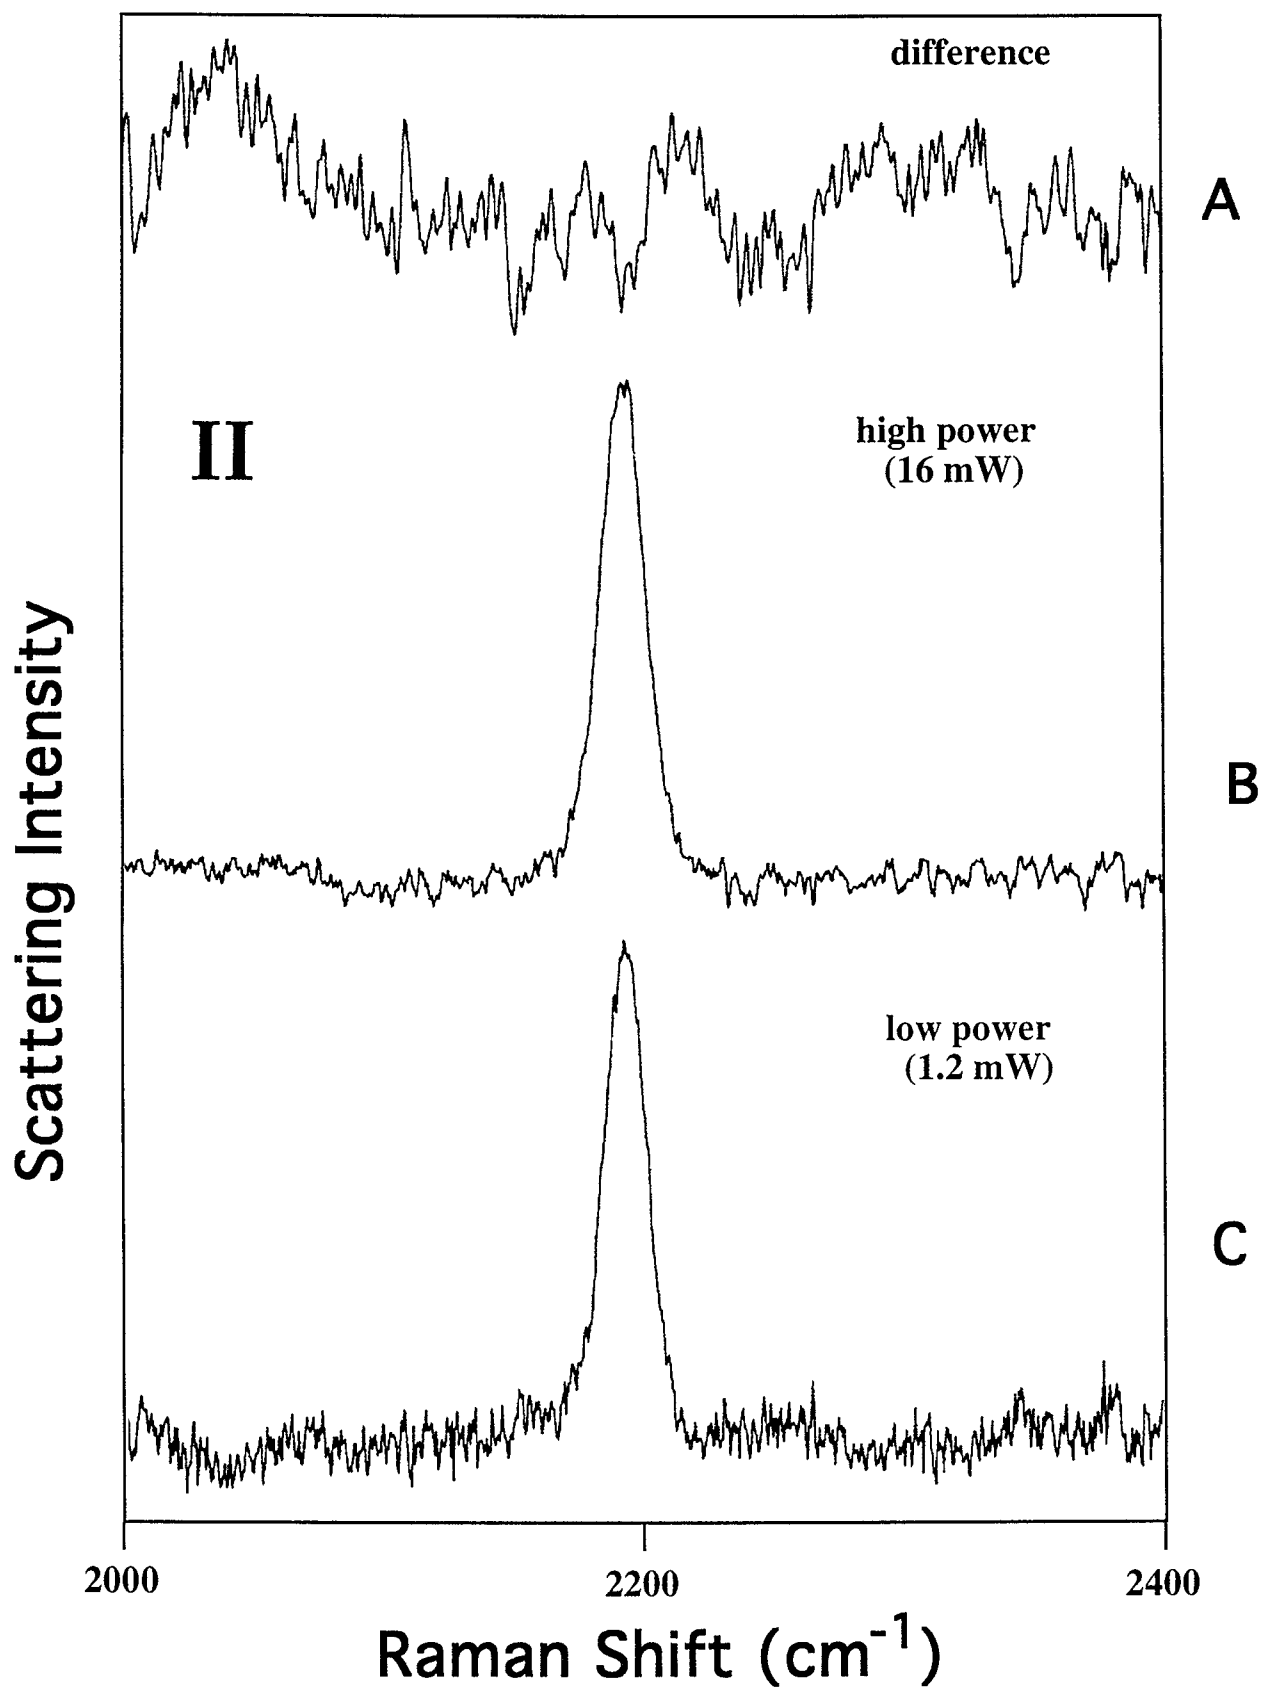

Supplement: Supplementary file 1 [file 5754090]
